# Supplementary material for: Epithelial microbial sensing through the non-canonical inflammasome modulates airway type 2 immunity
Source: Research Square preprint supplement (doi:10.21203/rs.3.rs-8003045/v1), 2025-11-14

Figure 1A GSDMD

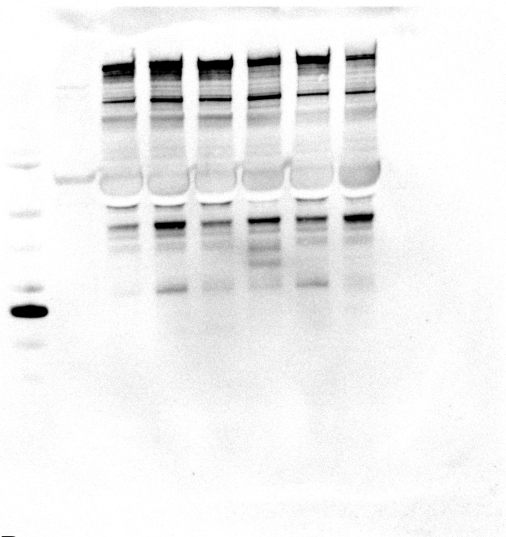

Figure 1A GAPDH

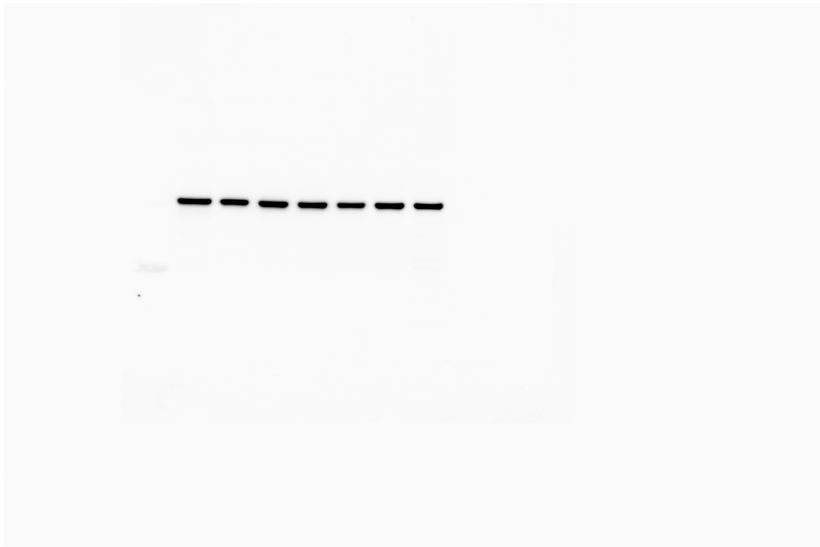

Figure 1B GSDMD

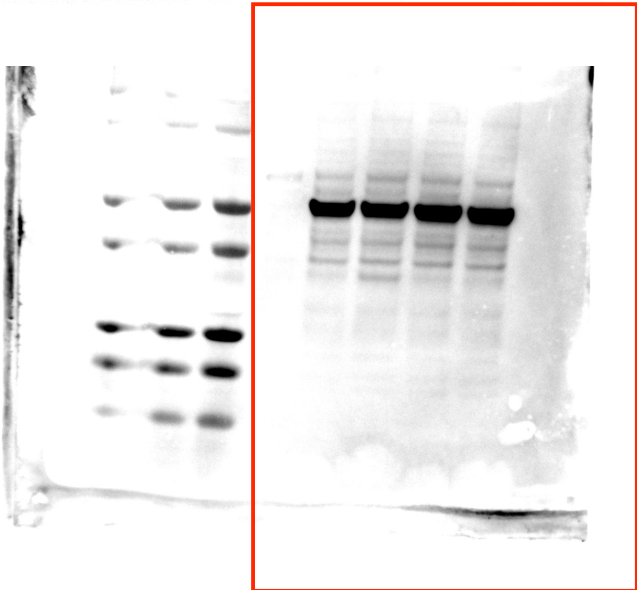

Figure 1B GAPDH

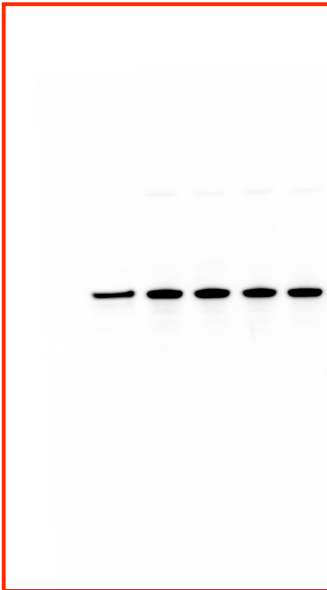

Figure 2J GAPDH

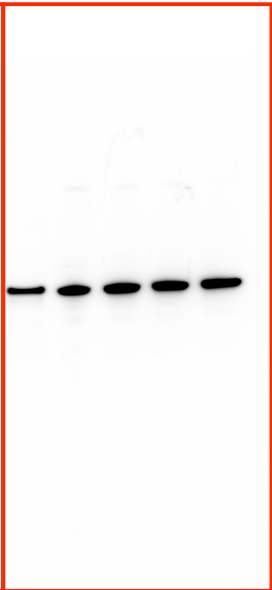

Figure 1D IL33

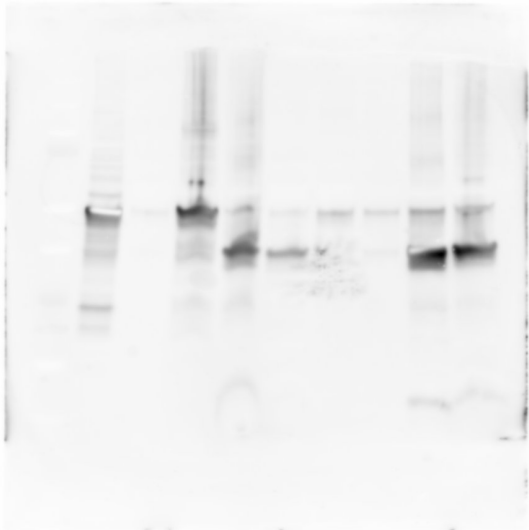

Figure 1H GSDMD

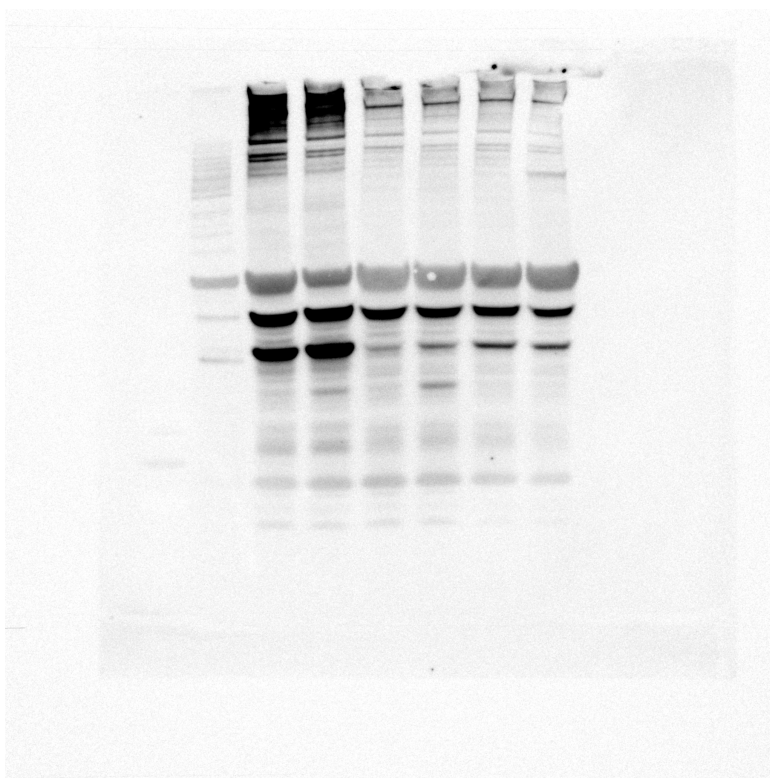

Figure 1H GAPDH

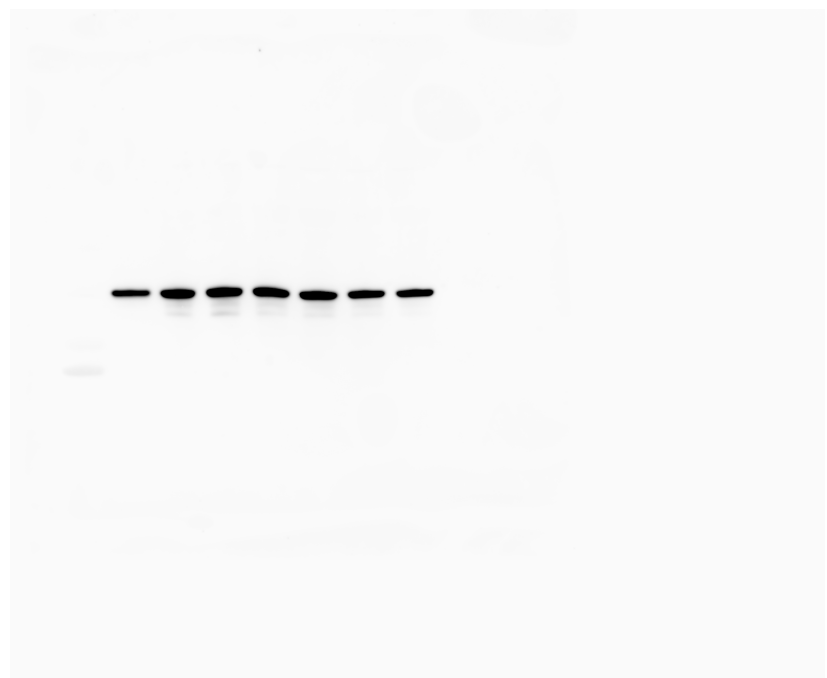

Figure 2J GSDMD

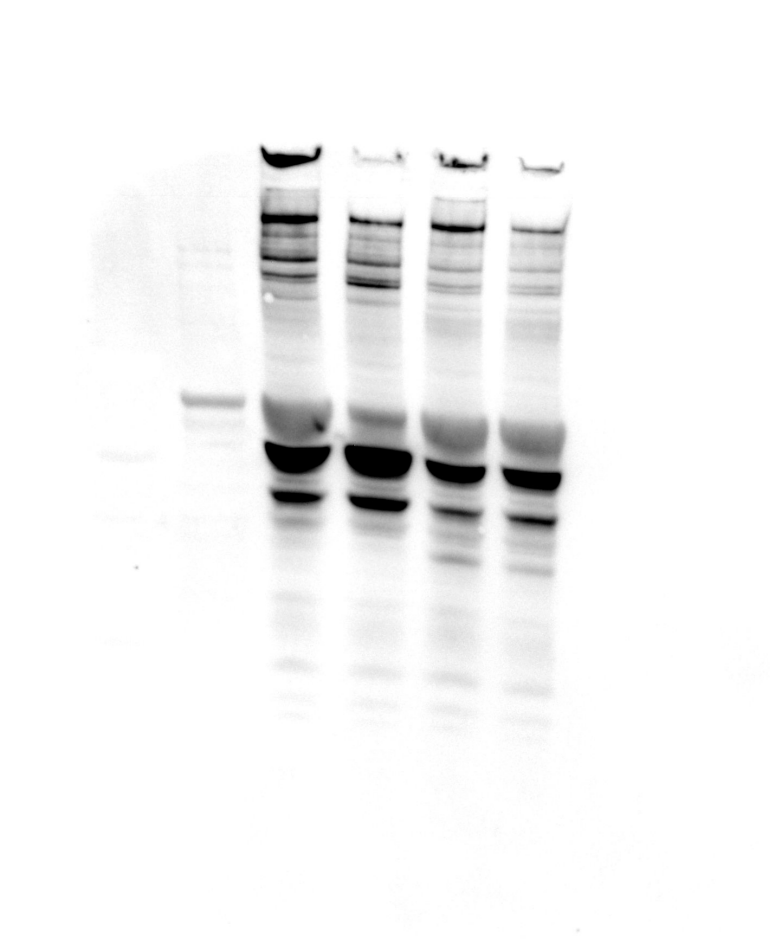

Figure 2K mouse IL-33

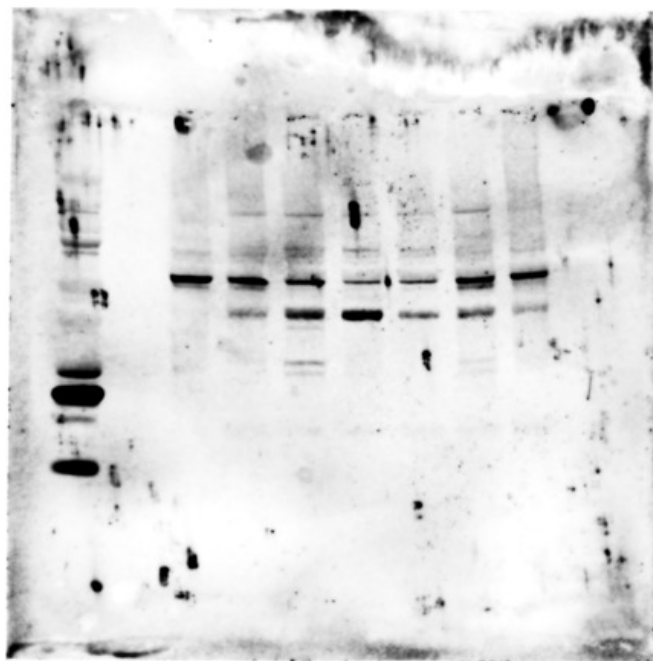

Figure 3A GSDMD

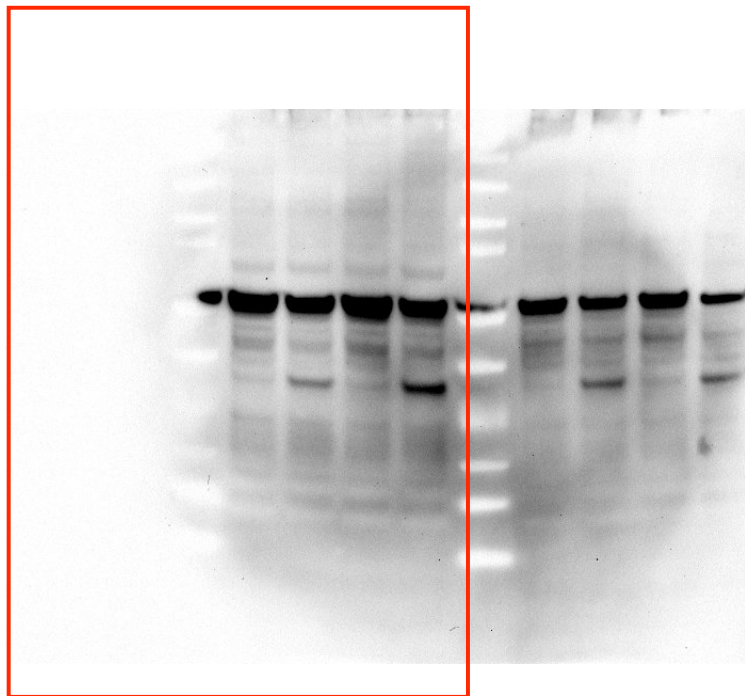

Figure 3A GAPDH

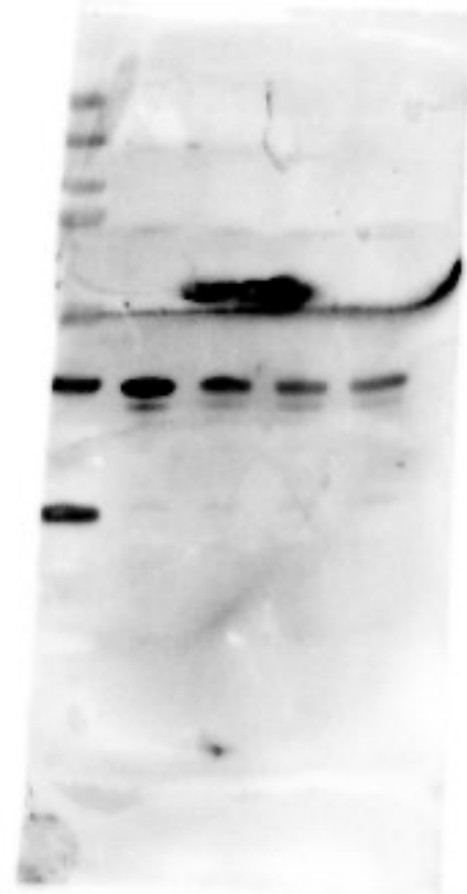

Figure 3B IL33

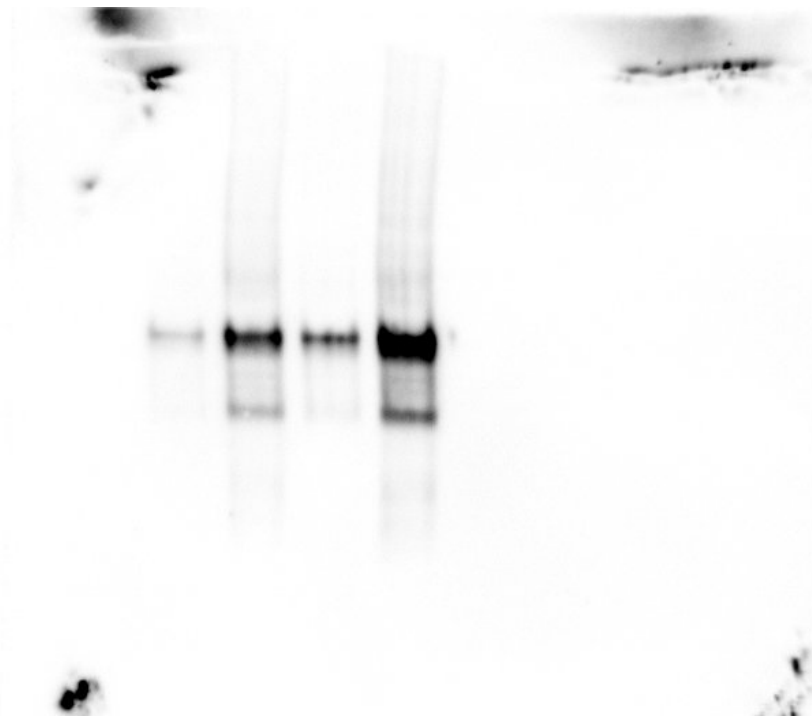

Supplemental Figure 1 B

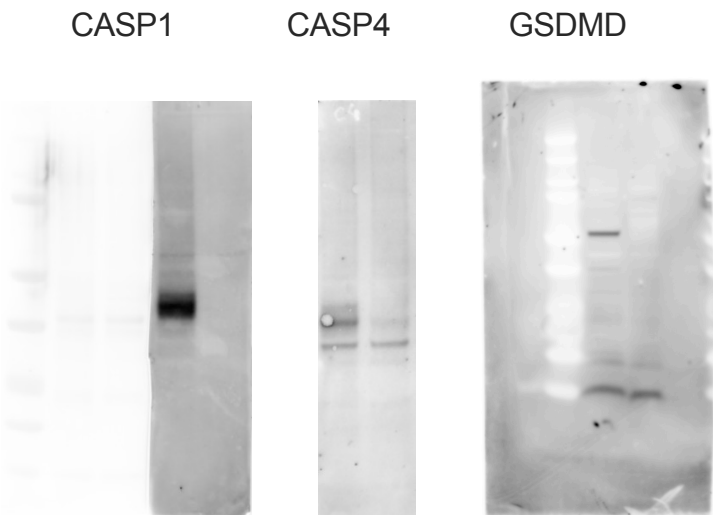

Supplemental Figure 1 B GAPDH

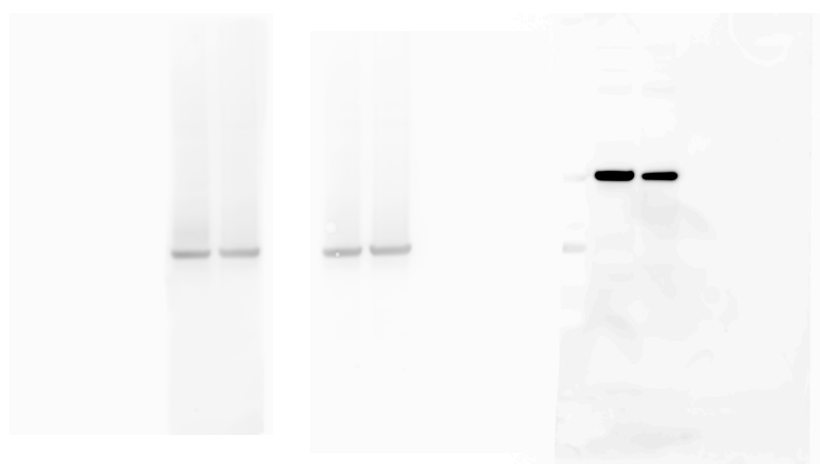

Supplemental Figure 1 C

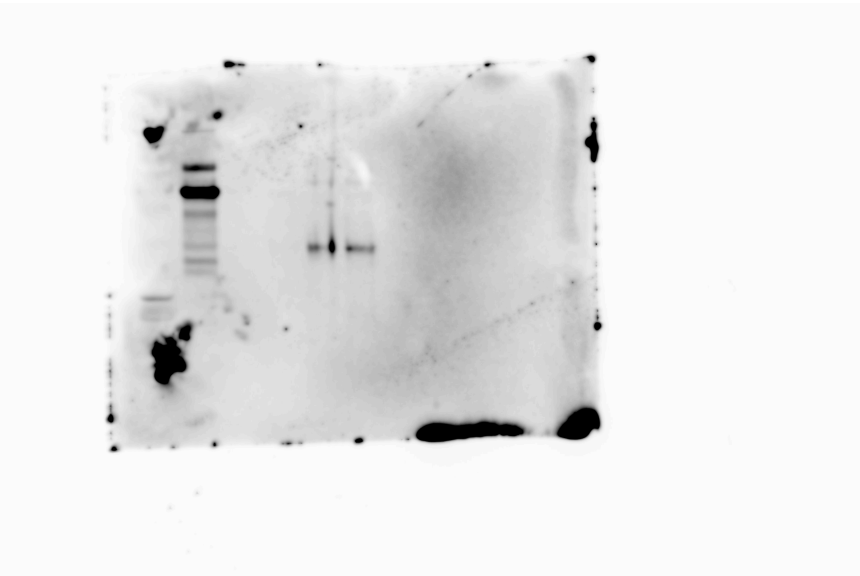

Supplemental Figure 2H

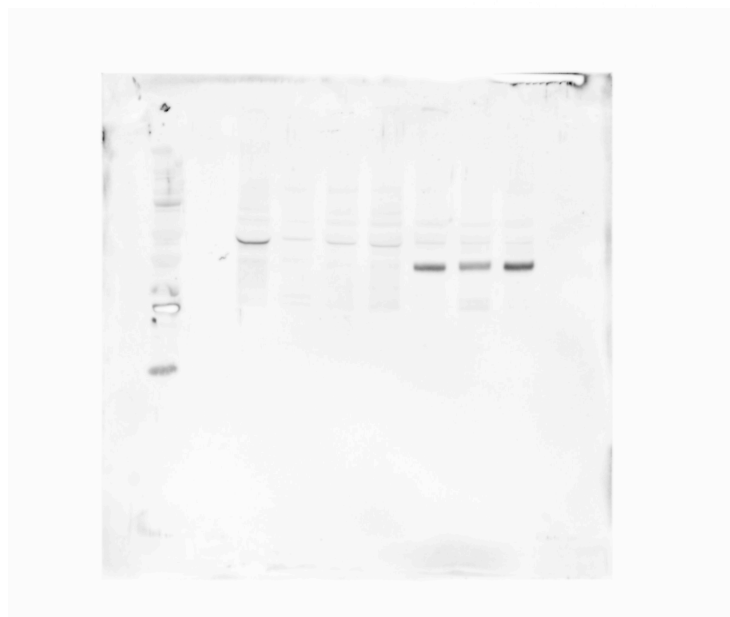

Supplemental Figure 1 I

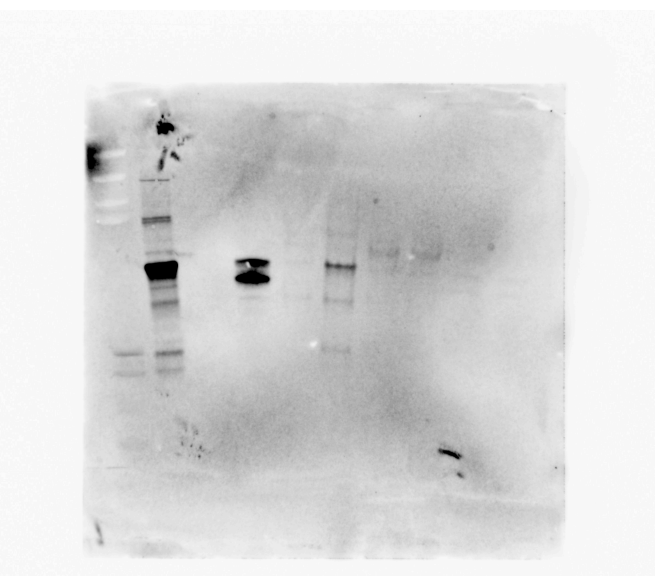

Supplemental Figure 2I

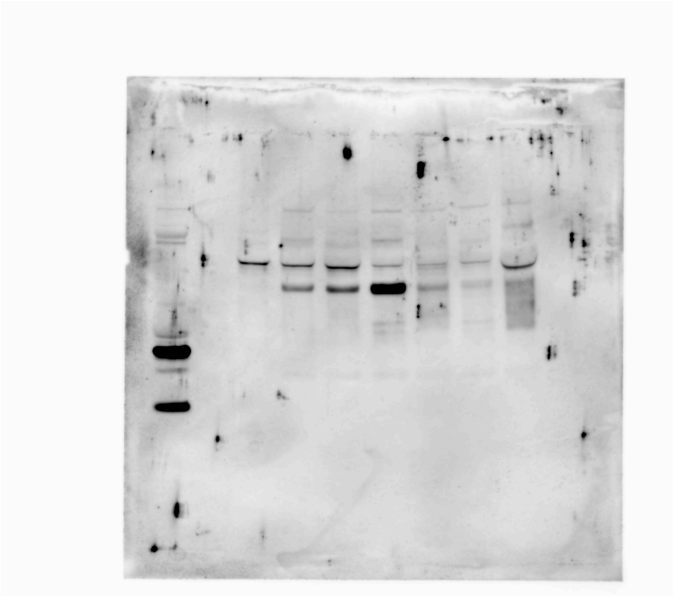

Supplement: Supplementary file 1 [file 973f029cbab78ce0c1e3678d.pdf]
